# Supplementary material
Source: PubMed Central journal article supplement (PMC3978398)
Supplement: neo1602_0180SD2.pdf [file neo1602_0180SD2.pdf]

**Supplemental Table 1: Proteins identified in triplicate by densitometric analysis of RayBio® protein array of lung-conditioned media versus basal media**

| RayBiotech Name      | Mean Densitometry Values |       | Ensembl ID         | Gene Symbol | Gene Name                                             | Location            | Type(s)  |
|----------------------|--------------------------|-------|--------------------|-------------|-------------------------------------------------------|---------------------|----------|
|                      | Mito+                    | Lung  |                    |             |                                                       |                     |          |
| Neg                  | 1                        | 1     |                    |             |                                                       |                     |          |
| 6Ckine               | 270                      | 2845  | ENSMUSG00000071003 | CCL21       | chemokine (C-C motif) ligand 21                       |                     |          |
| BLC                  | 1                        | 4530  | ENSMUSG00000023078 | CXCL13      | chemokine (C-X-C motif) ligand 13                     |                     |          |
| Cardiotrophin-1      | 1                        | 4418  | ENSMUSG00000042340 | CTF1        | cardiotrophin 1                                       |                     |          |
| CCL1 / I-309 / TCA-3 | 1                        | 7517  | ENSMUSG00000020702 | CCL1        | chemokine (C-C motif) ligand 1                        |                     |          |
| CD30 L               | 59                       | 1323  | ENSMUSG00000028362 | TNFSF8      | tumour necrosis factor (ligand) superfamily, member 8 |                     |          |
| CD40 Ligand / TNFSF5 | 1                        | 2660  | ENSMUSG00000031132 | CD40LG      | CD40 ligand                                           |                     |          |
| CRG-2                | 1                        | 4300  | ENSMUSG00000034855 | CXCL10      | chemokine (C-X-C motif) ligand 10                     | Extracellular Space | cytokine |
| CTACK                | 1                        | 74435 | ENSMUSG00000066202 | CCL27       | chemokine (C-C motif) ligand 27                       |                     |          |
| Eotaxin              | 1                        | 2886  | ENSMUSG00000020676 | CCL11       | chemokine (C-C motif) ligand 11                       |                     |          |
| Eotaxin-2            | 1                        | 2830  | ENSMUSG00000004814 | CCL24       | chemokine (C-C motif) ligand 24                       |                     |          |
| Erythropoietin (EPO) | 1                        | 1579  | ENSMUSG00000029711 | EPO         | erythropoietin                                        |                     |          |
| IL-24                | 1                        | 3575  | ENSMUSG00000026420 | IL24        | interleukin 24                                        |                     |          |
| IL-27                | 1                        | 3853  | ENSMUSG00000044701 | IL27        | interleukin 27                                        |                     |          |
| Osteopontin          | 142                      | 10183 | ENSMUSG00000029304 | SPP1        | secreted phosphoprotein 1                             |                     |          |
| RANTES               | 81                       | 10361 | ENSMUSG00000035042 | CCL5        | chemokine (C-C motif) ligand 5                        |                     |          |

|                     |     |      |                    |         |                                                        |                     |                            |
|---------------------|-----|------|--------------------|---------|--------------------------------------------------------|---------------------|----------------------------|
| TWEAK / TNFSF12     | 1   | 1048 | ENSMUSG00000090170 | TNFSF12 | tumour necrosis factor (ligand) superfamily, member 12 | Extracellular Space | cytokine                   |
| CCR9                | 211 | 2744 | ENSMUSG00000029530 | CCR9    | chemokine (C-C motif) receptor 9                       | Plasma Membrane     | G-protein coupled receptor |
| b FGF               | 245 | 1267 | ENSMUSG00000037225 | FGF2    | fibroblast growth factor 2 (basic)                     |                     |                            |
| BTC (Betacellulin)  | 1   | 4510 | ENSMUSG00000082361 | BTC     | betacellulin                                           |                     |                            |
| Cripto              | 1   | 4162 | ENSMUSG00000032494 | TDGF1   | teratocarcinoma-derived growth factor 1                |                     |                            |
| EG-VEGF / PK1       | 1   | 2891 | ENSMUSG00000070368 | PROK1   | prokineticin 1                                         |                     |                            |
| Endocan             | 1   | 3704 | ENSMUSG00000042379 | ESM1    | endothelial cell-specific molecule 1                   | Extracellular Space | growth factor              |
| Epigen              | 1   | 3443 | ENSMUSG00000035020 | EPGN    | epithelial mitogen homolog (mouse)                     |                     |                            |
| Epiregulin          | 1   | 4224 | ENSMUSG00000029377 | EREG    | epiregulin                                             |                     |                            |
| GDF-8               | 1   | 3186 | ENSMUSG00000026100 | MSTN    | myostatin                                              |                     |                            |
| VEGF                | 16  | 6044 | ENSMUSG00000023951 | VEGFA   | vascular endothelial growth factor A                   |                     |                            |
| Activin A           | 242 | 1375 | ENSMUSG00000000532 | ACVR1B  | activin A receptor, type IB                            | Plasma              |                            |
| Activin C           | 183 | 7449 |                    |         |                                                        |                     |                            |
| Csk                 | 1   | 6538 | ENSMUSG00000032312 | CSK     | c-src tyrosine kinase                                  | Cytoplasm           | kinase                     |
| Tie-2               | 1   | 8027 | ENSMUSG00000006386 | TEK     | TEK tyrosine kinase, endothelial                       | Plasma Membrane     |                            |
| AgRP                | 1   | 8330 | ENSMUSG00000005705 | AGRP    | agouti related protein homolog (mouse)                 | Extracellular Space |                            |
| ALCAM               | 1   | 4269 | ENSMUSG00000022636 | ALCAM   | activated leukocyte cell adhesion molecule             | Plasma Membrane     | other                      |
| Angiopoietin-like 2 | 1   | 4978 | ENSMUSG00000004105 | ANGPTL2 | angiopoietin-like 2                                    | Extracellular Space |                            |

|                    |     |       |                    |          |                                                                 |                     |       |
|--------------------|-----|-------|--------------------|----------|-----------------------------------------------------------------|---------------------|-------|
| BCMA / TNFRSF17    | 123 | 1656  | ENSMUSG00000022496 | TNFRSF17 | tumour necrosis factor receptor superfamily, member 17          | Plasma Membrane     |       |
| CD11b              | 185 | 2927  | ENSMUSG00000030786 | ITGAM    | integrin, alpha M (complement component 3 receptor 3 subunit)   | Plasma Membrane     |       |
| CRP                | 120 | 2854  | ENSMUSG00000037942 | CRP      | C-reactive protein, pentraxin-related                           | Extracellular Space |       |
| Cerberus 1         | 1   | 2730  | ENSMUSG00000038192 | CER1     | cerberus 1, cysteine knot superfamily, homolog (Xenopus laevis) | Extracellular Space |       |
| Chordin-Like 2     | 1   | 30340 | ENSMUSG00000030732 | CHRDL2   | chordin-like 2                                                  | Extracellular Space |       |
| Crossveinless-2    | 1   | 15539 | ENSMUSG00000031963 | BMPER    | BMP binding endothelial regulator                               | Extracellular Space |       |
| Cryptic Endostatin | 1   | 3533  | ENSMUSG00000026124 | Cfc1     | cripto, FRL-1, cryptic family 1                                 | unknown             | other |
|                    | 1   | 6658  | ENSMUSG00000001435 | COL18A1  | collagen, type XVIII, alpha 1                                   | Extracellular Space |       |
| IGFBP-3            | 1   | 8092  | ENSMUSG00000020427 | IGFBP3   | insulin-like growth factor binding protein 3                    | Extracellular Space |       |
| IGFBP-5            | 1   | 4185  | ENSMUSG00000026185 | IGFBP5   | insulin-like growth factor binding protein 5                    | Extracellular Space |       |
| IGFBP-6            | 1   | 33426 | ENSMUSG00000023046 | IGFBP6   | insulin-like growth factor binding protein 6                    | Extracellular Space |       |
| IL-17RD            | 185 | 2171  | ENSMUSG00000040717 | IL17RD   | interleukin 17 receptor D                                       | Cytoplasm           |       |
| L-Selectin         | 169 | 10097 | ENSMUSG00000026581 | SELL     | selectin L                                                      | Plasma Membrane     |       |
| P-Selectin         | 1   | 9704  | ENSMUSG00000026580 | SELP     | selectin P (granule membrane protein 140kDa, antigen CD62)      | Plasma Membrane     |       |
| RELM beta          | 142 | 68899 | ENSMUSG00000022650 | Retnlb   | resistin like beta                                              | Extracellular Space |       |

|                                        |     |       |                    |         |                                                                                |                      |                         |
|----------------------------------------|-----|-------|--------------------|---------|--------------------------------------------------------------------------------|----------------------|-------------------------|
| TFPI                                   | 230 | 4968  | ENSMUSG00000027082 | TFPI    | tissue factor pathway inhibitor (lipoprotein-associated coagulation inhibitor) | Extracellular Space  |                         |
| TIMP-1                                 | 1   | 19806 | ENSMUSG00000001131 | TIMP1   | TIMP metalloproteinase inhibitor 1                                             | Extracellular Space  |                         |
| TIMP-2                                 | 1   | 9406  | ENSMUSG00000017466 | TIMP2   | TIMP metalloproteinase inhibitor 2                                             | Extracellular Space  | other                   |
| Ubiquitin                              | 1   | 10050 |                    | UBB     |                                                                                |                      |                         |
| VCAM-1                                 | 140 | 21025 | ENSMUSG00000027962 | VCAM1   | vascular cell adhesion molecule 1                                              | Plasma Membrane      |                         |
| VE-Cadherin                            | 63  | 4164  | ENSMUSG00000031871 | CDH5    | cadherin 5, type 2 (vascular endothelium)                                      | Plasma Membrane      |                         |
| Urokinase                              | 192 | 15501 | ENSMUSG00000021822 | PLAU    | plasminogen activator, urokinase                                               | Extracellular Space  | peptidase               |
| beta-Catenin                           | 71  | 1993  | ENSMUSG00000006932 | CTNNB1  | catenin (cadherin-associated protein), beta 1, 88kDa                           | Nucleus              | transcription regulator |
| CD30                                   | 1   | 3206  | ENSMUSG00000028602 | TNFRSF8 | tumour necrosis factor receptor superfamily, member 8                          | Plasma Membrane      |                         |
| CD40                                   | 1   | 26857 | ENSMUSG00000017652 | CD40    | CD40 molecule, TNF receptor superfamily member 5                               | Plasma Membrane      |                         |
| Coagulation Factor III / Tissue Factor | 1   | 48368 | ENSMUSG00000028128 | F3      | coagulation factor III (thromboplastin, tissue factor)                         | Plasma Membrane      |                         |
| Common gamma Chain / IL-2 R gamma      | 1   | 18445 | ENSMUSG00000031304 | IL2RG   | interleukin 2 receptor, gamma                                                  | Plasma Membrane      | transmembrane receptor  |
| CTLA-4 / CD152                         | 1   | 4475  |                    | CTLA4   | cytotoxic T-lymphocyte-associated protein-4                                    | Membrane and soluble |                         |
| Endoglin / CD105                       | 1   | 8112  | ENSMUSG00000026814 | ENG     | endoglin                                                                       | Plasma Membrane      |                         |
| E-Selectin                             | 1   | 2866  | ENSMUSG00000026582 | SELE    | selectin E                                                                     | Plasma Membrane      |                         |
| GFR alpha-2 / GDNF R alpha-2           | 1   | 40771 | ENSMUSG00000022103 | GFRA2   | GDNF family receptor alpha 2                                                   | Plasma Membrane      |                         |

|                                     |     |       |                    |           |                                                            |                    |                        |
|-------------------------------------|-----|-------|--------------------|-----------|------------------------------------------------------------|--------------------|------------------------|
| GFR alpha-3 /<br>GDNF R alpha-<br>3 | 1   | 4721  | ENSMUSG00000024366 | GFRA3     | GDNF family receptor alpha 3                               | Plasma<br>Membrane |                        |
| GFR alpha-4 /<br>GDNF R alpha-<br>4 | 1   | 42538 | ENSMUSG00000027316 | GFRA4     | GDNF family receptor alpha 4                               | Plasma<br>Membrane |                        |
| HVEM /<br>TNFRSF14                  | 287 | 16161 | ENSMUSG00000042333 | TNFRSF14  | tumour necrosis factor receptor<br>superfamily, member 14  | Plasma<br>Membrane | transmembrane receptor |
| ICAM-1                              | 244 | 2259  | ENSMUSG00000037405 | ICAM1     | intercellular adhesion molecule<br>1                       | Plasma<br>Membrane |                        |
| TSLPR                               | 1   | 9584  | ENSMUSG00000033467 | CRLF2     | cytokine receptor-like factor 2                            | Plasma<br>Membrane |                        |
| TWEAK R /<br>TNFRSF12               | 1   | 2225  |                    | TNFRSF12A | tumour necrosis factor receptor<br>superfamily, member 12A | Plasma<br>Membrane |                        |

**Supplemental Table 2.** Proteins of interest identified by Ingenuity Pathway Analysis of protein array data

| <b>Function Queried</b>  | <b>Factors Identified</b>                                                                                                                                                                                                                                                                                      |
|--------------------------|----------------------------------------------------------------------------------------------------------------------------------------------------------------------------------------------------------------------------------------------------------------------------------------------------------------|
| <b>Metastasis</b>        | ANGPTL2, COL18A1, F3, FGF2, FLT1, ICAM1, IGFBP5, IL2RG, PLAU, SELE, SPP1, TEK, TFPI, TIMP1, VCAM1, VEGFA                                                                                                                                                                                                       |
| <b>Migration</b>         | ALCAM, CCL1, CCL11, CCL24, CCL5, CCR9, CD40LG, CDH5, CER1, COL18A1, CRP, CSK, CTNNB1, CXCL10, CXCL13, ENG, EPO, EREG, F3, FGF2, FLT1, GFRA3, ICAM1, IGFBP3, IGFBP5, IGFBP6, IL24, IL27RA, ITGAM, PLAU, PROK1, SELE, SELL, SELP, SPP1, TDGF1, TEK, TFPI, TIMP1, TIMP2, TNFRSF14, TNFRSF8, TNFSF12, VCAM1, VEGFA |
| <b>Neoplastic Growth</b> | ALCAM, ANGPTL2, CCL11, CCL5, CCR9, CD40LG, CDH5, CER1, CHRDL2, COL18A1, CRP, CTNNB1, CXCL10, CXCL13, ENG, EPO, EREG, F3, FGF2, FLT1, ICAM1, IGFBP3, IGFBP5, IGFBP6, IL24, IL27RA, IL2RG, PLAU, SELE, SELL, SPP1, TDGF1, TEK, TFPI, TIMP1, TIMP2, TNFRSF14, TNFRSF8, TNFSF12, TNFSF8, VCAM1, VEGFA              |
| <b>Adhesion</b>          | ALCAM, CCL1, CCL11, CCL5, CD40LG, CDH5, COL18A1, CRP, CSK, CTNNB1, CXCL10, CXCL13, ENG, EPO, F3, FGF2, FLT1, ICAM1, IGFBP3, ITGAM, PLAU, SELE, SELL, SELP, SPP1, TDGF1, TEK, TFPI, TIMP1, TIMP2, TNFRSF17, TNFRSF8, VCAM1, VEGFA                                                                               |

(n=3; lung-conditioned media versus basal media)
